# 1 **Assessing the statistical reporting quality in high-impact factor** 2 **urology journals**

3 Shuangyang Dai<sup>1</sup>, Hong Xu<sup>2</sup>, Beibei Li<sup>1</sup>, Jingao Zhang<sup>1</sup>, Xiaobin Zhou<sup>1,\*</sup>

4 <sup>1</sup> Department of Epidemiology and Health Statistics, School of public health, Qingdao University, No.  
5 38 Dengzhou Road, Qingdao, Shandong Province, 266021, People's Republic of China

6 <sup>2</sup> Department of orthodontics, the affiliated hospital of Qingdao University. School of Stomatology,  
7 Qingdao University

8 \*corresponding author: Tel:13963929151

9 Email: xiaobin\_zhou@126.com

## 10 **Abstract**

11 **Backgrounds** Observational studies plays an important role in urology studies, But few studies have  
12 paid attention to the statistical reporting quality of observational studies. The purpose of this study  
13 was to investigate the frequency and evaluate the reporting quality of statistical methods of the  
14 published observational studies in urology.

15 **Methods** The five urology journals were selected according to the 5-year impact factor. A systematic  
16 literature search was performed in PubMed for relevant articles. The quality of statistical reporting was  
17 assessed according to assessment criteria.

18 **Results** A total of 193 articles were included in this study. The mean statistical reporting score of  
19 included articles was 0.42 (SD=0.15), accounting for 42% of total score. The items that must be  
20 reported with a reporting rate more than 50% were: alpha level (n=122, 65.2%), confidence intervals  
21 (n=134, 69.4%), name of statistical package (n=158, 84.5%) and exact *P*-values (n=161, 86.1%). The  
22 items with a reporting rate less than 50% were: outliers (n=2, 1.0%) and sample size (n=13, 6.7%). For  
23 multivariable regression models (liner, logistic and Cox), variables coding (n=27, 40.7%), validation  
24 analysis of assumptions (n=58, 40.3%), interaction test (n=43, 30.0%), collinearity diagnostics (n=5,  
25 3.5%) and goodness of fit test (n=6, 5.9%) were reported. Number of authors more than 7(OR=2.06,  
26 95%CI=1.04-4.08) and participation of statistician or epidemiologist (OR=1.73, 95%CI=1.18-3.39)  
27 were associated with the superior reporting quality.

28 **Conclusion** The statistical reporting quality of published observational studies in 5 high-impact factor  
29 urological journals was alarming. We encourage researchers to collaborate with statistician or  
30 epidemiologist. The authors, reviewers and editors should increase their knowledge of statistical  
31 methods, especially new and complex methods.

32 **Keywords** Urology; Observational studies; Statistical methods; Reporting quality

## 33 **Introduction**

34 Nowadays, more and more medical researchers notice the phenomenon that the main results of  
35 some research cannot be reproduced (1, 2), and improper use of statistical methods or inadequate  
36 statistical reporting may be the important reasons for this phenomenon. The low-quality statistical  
37 reporting may not make full use of research results, resulting in a waste of valuable information and  
38 varying degrees of bias. In addition, it may also make editors and readers unable to measure the  
39 reliability of research, and make readers misinterpret the results of the study, thus leading to errors in  
40 the secondary studies (3).

41 Truthly, the poor statistical reporting problem is long-standing, but few people pay attention to it.  
42 In 1966, the first paper on the quality of medical literature statistical report was published (4), and then

43 dozens of similar studies were published (5). These studies found that the application of statistical  
44 methods is becoming more and more complicated, but the problem of insufficient statistical reporting  
45 has always existed. To make matters worse, the literature evaluated by these studies was from  
46 influential general medical and professional journals.

47 In 2015, T.A. Lang *et al.* published the “Statistical Analyses and Methods in the Published  
48 Literature” (SAMPL) guidelines to improve the quality of basic statistical reporting (6). The principle  
49 of SAMPL is that “authors should describe statistical methods with sufficient detail to enable readers in  
50 the professional domain to access raw data to verify the results of the report”. In 2017, Pentti Nieminen  
51 *et al.* made the SIMA (Statistical Intensity of Medical Articles) tool and assessed the statistical  
52 intensity in the high impact factor respiratory journal’s articles, and found that approximately one third  
53 of the respiratory papers provided incomplete description of their statistical reports (7, 8). Even though  
54 the SAMPL guidelines and SIMA broaden the standards for the scrutiny of statistical methods, there is  
55 still a void in requiring or assessing the reporting of statistical methods in observational studies.

56 Therefore, we carried out this study to describe the frequency and trends of statistical methods  
57 used in high-impact urology journals, and evaluate the reporting quality of statistical methods. We  
58 hope this study can identify the major quality deficiencies in the statistical reporting of urological  
59 observational studies, and promote the improvement of statistical reporting quality.

## 60 **Material and Methods**

### 61 **Journals selection and search strategy**

62 Top five urology journals were selected according to 5-year impact factor (excluding review  
63 journals), including European Urology (IF=17.581), Journal of Urology (IF=5.157), BJU International  
64 (IF=4.688), Prostate Cancer and Prostatic Diseases (IF=4.099), and Prostate (IF=3.820). The relevant  
65 studies from January 1, 2009 to September 30, 2019 were searched in the PubMed. The search strategy  
66 was shown in Figure. 1.

### 67 **Articles selection**

68 Articles that met the following criteria were selected: (1) original articles; (2) observational  
69 studies, including cross-sectional studies, case-control studies, and cohort studies; (3) studies on  
70 humans, including both adults and children. The exclusion criteria were as follows: (1) review articles  
71 and case reports, (2) quasi-randomized trial, randomized controlled trials, and other interventional  
72 studies, (3) unpublished data and published abstracts only.

73 The articles retrieved were preliminary reviewed according to titles and abstracts by two  
74 investigators independently. Any disagreement was resolved by consulting with senior authors. After  
75 the initial screening, two investigators retrieved the full texts of relevant researches and determined the  
76 final list based.

### 77 **Frequency and trends of statistical methods used in the included articles**

78 Two investigators extracted data independently from the included articles. Statistical methods  
79 used in the article and general characteristics were extracted, including name of journal, publication  
80 time, origin of corresponding author, type of study, number of authors, impact factor, funding support,  
81 the affiliation of corresponding author, international collaborative authorship, and participation of  
82 statistician or epidemiologist.

83 A standardized evaluation form (see Appendix 1) based on Emerson *et al.*(9) was used to record  
84 the frequency and trends of statistical methods for observational studies published in the selected  
85 urology journals. The original study divided statistical methods into 21 categories, 20 categories with  
86 the exception of benefit analysis have been incorporated into this checklist with slightly modified. The

87 items containing the following information have been added to this checklist: multiple comparisons,  
88 repeated measurement data analysis, consistent measurement, Bayesian analysis.

### 89 **Statistical reporting quality of the included articles**

90 Two reviewers applied the assessment criteria (see Appendix 2) independently to appraise the  
91 statistics reporting quality of included studies. This checklist was established based on the SAMPL  
92 guidelines (6) and other previously published studies (10-12), and the items were modified to be listed  
93 in a simple and readable manner. All of the logistic regression assessment items droved from Zhang's  
94 research (13), and Cox regression items were from Zhu's research (14). The checklist consists of 7  
95 items (marked \*) that must be reported and 39 items that are subject to selective reporting based on the  
96 statistical methods used. The proportions of items that were adequately reported in the statistical  
97 methods used were calculated as statistical reporting quality score for each article. The total score of  
98 statistical reporting score of each article was 100% (1). The evaluations that two investigators argued  
99 over were resolved by discussion with the senior author.

### 100 **Statistics analysis**

101 Continuous variables with normal distribution were represented by mean  $\pm$  standard deviation (SD),  
102 non-normal variables by medians (interquartile range), and categorical variables by frequency  
103 (percentage). The comparisons of means between the two groups were performed by independent  
104 Student's t-test, and multi-group by one-way analysis of variance (ANOVA). The Mann-Whitney U  
105 test and Kruskal-Wallis test were used to analyze variables for non-normal variables. According to a  
106 cutoff value of the 75 percentile of the statistical reporting quality score, the articles were divided into  
107 high and low quality groups. Univariate and multivariate logistic regression analyses were performed  
108 to identify the factors affecting statistical reporting quality. The variables with a  $P \leq 0.05$  for univariate  
109 logistic analyses were included in the multivariable logistic regression model. All the statistical  
110 analyses were performed using SPSS version 21.0. All significance tests were two-sided, and  $P \leq 0.05$   
111 was considered as significant.

### 112 **Results**

#### 113 **Search results**

114 The initial search of databases confirmed 8,605 potentially relevant articles without duplication.  
115 After the screening of titles and abstracts, 8,326 articles were excluded. In total, 279 full-text articles  
116 were further reviewed, with 84 articles were subsequently eliminated for various reasons. Finally, 193  
117 relevant articles were included. The process of literature retrieval was shown in the flow diagram  
118 (Figure.2).

#### 119 **General characteristics of the included articles**

120 Of the 193 articles, 58 (30.05%) were cross-sectional studies, 56 (29.02%) were case-control  
121 studies, and 79 (40.93%) were cohort studies. Characteristics of included articles were shown in  
122 Table.1.

#### 123 **The frequency of statistical methods applied in the included articles**

124 The frequency of statistical methods in included articles was shown in Table.2. 6 (3.1%) articles  
125 didn't use statistical methods or used descriptive statistics only. 36 (18.7%) articles only used simple  
126 methods such as t-test and chi-square test, 54 (28.0%) articles only adopted multivariable analyses like  
127 logistic regression and cox regression, 97 articles (50.3%) both employed simple and multivariable  
128 analyses. Logistic regression (n=93, 48.2%) and Chi-square test (n=90, 46.6%) were the most  
129 frequently used statistical methods in included studies. 7 articles (3.6%) used propensity score method.  
130 None of the articles used Bayesian methods, artificial neural networks and machine learning. The

131 number of statistical methods in articles with 7 or more authors was more than others. The trend of the  
132 percentages of the different statistical methods used over time was shown in Figure.3.

### 133 **The reporting quality of statistical methods of included articles**

134 The mean score of reporting quality in included articles was 0.42 (range: 0.11-0.82) with a  
135 standard deviation of 0.15. 132 (68.4%) articles have a score less than 0.5. The statistical reporting  
136 score has not been improved over the past decade. The articles that number of author greater than or  
137 equal to 7 had a higher score than others, but the difference was not statistically significant. The  
138 statistical reporting score was similar in three type studies. The articles that have participation of  
139 statistician or epidemiologist tend to have a higher statistical reporting score.

140 As shown in Table.3, three of the seven items that must be reported were often missed: outliers  
141 (n=2, 1.0%), sample size (n=13, 6.7%), missing data (n=19, 9.8%). Two items were reported  
142 suboptimal: one or two tailed (n=84, 44.9%), confidence intervals (n=134, 69.4%). In addition, 158  
143 articles (84.5%) reported the name of statistical package or program with 161 articles (86.1%) reported  
144 exact *P*-values of significance test.

145 The quality of the multiple analyses reporting left much to be desired. The mean of reporting  
146 score of the multiple logistic regression was 0.24, 0.27 for multiple cox regression, and 0.29 for  
147 multiple linear regression. The item that was reported most often in multiple logistic regression was  
148 “sufficient events” (n=92, 98.9%) followed by conformity with linear gradient (n=25, 26.9%) and  
149 interactions between independent variables (n=24, 25.8%). The least-reported item was colinearity  
150 analysis (n=3, 3.2%), and the goodness of fit test was slightly better (n=5, 5.4%). Methods for variable  
151 selection (n=23), coding of variables (n=19), reason of selection of variables (n=8) and validation of  
152 the statistical model (n=6) were reported in 24.7%, 20.4%, 8.6% and 6.5% of the articles, respectively.  
153 Of the reporting of Cox regression models, assumption of proportional hazard were reported in 66.7%  
154 studies (n=28). However, important information such as interaction test (n=17, 40.5%), methods for  
155 variable selection (n=7, 16.7%), variables coding (n=7, 16.7%), reason of selection of variables (n=5,  
156 11.9%) and colinearity test (n=1, 2.4%) were rarely reported. Seven articles (17.1%) assessed  
157 assumptions for t-test and 1 article for ANOVA (4.0%). Nine articles (23.1%) described the reason for  
158 conducting non-parametric tests.

159 The included articles were divided into inferior (n=144) and superior reporting quality groups  
160 (n=49) based on the cut-off value (0.50). As shown in table.4, univariate logistic regression analyses  
161 showed the following factors were related to the high reporting quality: participation of a statistician or  
162 epidemiologist (OR=1.92, 95%CI=1.04-3.71) and number of authors (OR=2.23, 95%CI=1.13-4.37).

163 Multivariate logistic regression analysis likewise demonstrated that participation of a statistician  
164 or epidemiologist (OR=1.73, 95%CI=1.18-3.39) and number of authors (OR=2.06, 95%CI=1.04-4.08)  
165 were associated with the superior reporting quality. The multivariate logistic model has sufficient  
166 events (the ratio of outcome events to independent variables was 24.5). The likelihood ratio test was  
167 used to validate the goodness of fit of the model, it was found that the fitting degree of the model was  
168 good ( $\chi^2=0.84$ ,  $P=0.656$ ). The max variance inflation factor (VIF) was 1.026 to indicate no  
169 multicollinearity among the independent variables.

### 170 **Discussion**

171 The study estimated the frequency, trend and reporting quality of statistical methods of 193  
172 observational studies published in five high-impact urology journals after 2008. The number and  
173 complexity of statistical methods have not changed in recent years, and the reporting quality of  
174 statistical methods has not improved either.

175 Compared with other disciplines in the medical field, fewer statistical methods were used in  
176 urology studies (15, 16). This is an alarming phenomenon, because researchers need to use several  
177 different statistical methods when facing different distribution data or different study purposes. Logistic  
178 regression models and chi-square test are most frequently used statistical methods in urological  
179 observational studies, because observational studies make heavy use of binary endpoints. Different  
180 from previous research results, our study indicated that the statistical methods of observational studies  
181 in urology have not changed more complicated in the past years (15-17). During recent years,  
182 statisticians have introduced new and complex methods that are attributable to the rapid expansion in  
183 computing capability, such as, Bayesian methods, artificial neural networks, and machine learning.  
184 However, we found no reference to these methods in any of the evaluated articles. These may be on  
185 account of the new complex statistical methods are not included in the introductory or second-level  
186 statistics courses, few authors are familiar with these methods. 36 (18.7%) articles only used simple  
187 tests, however, the use of simple statistical methods only, may be generally insufficient. Sophisticated  
188 and valid methods should be used based on study designs and data properties to avoid the bias and  
189 inflation of the type I error rate for the treatment effect.

190 Standardized statistical reporting of medical papers not only help editors or reviewers better  
191 understand research design to improve the quality of journal papers, but also enable readers in related  
192 fields to better understand the content and results of research to enrich their professional knowledge.  
193 However, the reporting quality of statistical methods in this study was inferior and still needs to be  
194 improved in many aspects. The average score of reporting quality in included articles was 0.42, and  
195 68.4% articles have a score less than 0.5, this means that the statistical reporting adherence of most  
196 articles was less than 50%.

197 Pre-study calculation of the sample size is necessary. The correct sample size of a study has the  
198 advantage of enhancing feasibility, reducing costs, and also has ethical implications. If the sample size  
199 is too small, it can not detect the effect, causing type II errors. Too large sample size may not only  
200 waste time, resources and money, but also difficult to implement. The Strengthening the Reporting of  
201 Observation Studies in Epidemiology (STROBE) statement also recommends researchers should  
202 explain how the study size was arrived at when they conducting observational studies (18, 19).  
203 However, only 6.7% articles reported the calculation of sample size or power analysis in this study.  
204 Data missing is a common and unavoidable problem in the medical studies. If the missing data are not  
205 handled properly, it will cause bias or insufficient use of data, thus reducing the efficiency of the study  
206 or biased inferences (20, 21). Nevertheless, we found that only 9.8% included studies indicated number  
207 of variables with missing data. Multivariate analyses are very sensitive to outliers, as outliers may  
208 cover or cause multicollinearity between independent variables and affect the parametric estimation of  
209 the model. However, just 1% articles detected outliers of the original data. The encouraging finding in  
210 this study was that the statistical software (84.5%) and exact *P* values (86.1%) were reported at high  
211 rates as essential requirements for statistical analysis. But there is still room for improvement. In  
212 statistical inference, it is advisable to report the exact *P*-values and confidence intervals. A large  
213 confidence interval means that the small sample size and large random error. In this way, the  
214 conclusion drawn by the exact *P* is questionable.

215 We found that 133 articles (68.9%) employed simple statistical methods and several problems  
216 were occurred in the reporting of these methods. The use of the t test and ANOVA requires that the  
217 data follow normal distribution and homogeneity of variance, whereas very fewer articles mention it.  
218 Using non-parametric tests on data suitable for parametric tests will reduce statistical power. Therefore,



219 the reason for using non-parametric tests should be stated. However, only 23.1% articles described the  
220 reasons.

221 The confounders controlling is a crucial step in analytical observational studies, and multivariable  
222 analyses are widely used as statistical adjustment techniques (22). 151 articles (78.2%) applied  
223 multivariable regression models such as logistic, Cox, linear, or Poisson regression. Several previous  
224 studies have shown that there was still room for improvement in quality of the reporting of multivariate  
225 regression (13, 22-24), which was consistent with our findings. Only 6 articles (5.9%) described  
226 goodness of fit test. By contrast, Casals *et al.* conducted a systematic review of 108 articles, and found  
227 testing for goodness-of-fit was reported in 15.7% (23). 96.5% included articles did not consider  
228 collinearity diagnostics, which may result unstable regression coefficients or wide confidence intervals,  
229 and even affect the selection of variables. Real, J *et al.* found that 26.2% articles that used multivariable  
230 analyses described linear gradient for continuous or rank variables (22). This reporting rate in our study  
231 was 40.3%, higher than their findings, but far from ideal as well. This may be due to the lack of  
232 automatic options for this test in current common statistical software.

233 The result of multivariate logistic regression analysis demonstrated that the participation of a  
234 statistician or epidemiologist was associated with high reporting quality. Professional statisticians or  
235 epidemiologists can not only provide correct guidance for data processing in research, but also better  
236 understand what important information in statistical analysis should be reported. We recommend that  
237 researchers seek the assistance of statistical professionals when processing data and writing articles.

238 Some limitations were present in our study as well. First, we only searched five top journals and  
239 not the full breadth of the articles related to urology. However, the highest impact factor journals have  
240 the utmost visibility in the urology literature and are likely more relied upon by doctors to inform  
241 practice. Second, only the most commonly used statistical methods are included in our checklists, and  
242 some rarely used statistical methods are not included.

#### 243 **Conclusion**

244 The statistical reporting of published observational studies in 5 high-impact factor urological  
245 journals was often ambiguous, especially for multivariable regression models, and there is room for  
246 improvement. The participation of statistician or epidemiologist may improve statistical reporting  
247 quality. The authors, reviewers and editors should increase their knowledge of statistical methods,  
248 especially new and complex methods. We recommend editorial board of journal publish guidelines to  
249 guide and facilitate critical appraisal of statistical reporting.

#### 250 **Supporting Information**

251 **Appendix S1** Common statistical methods in medical studies (Docx)

252 **Appendix S2** Reporting of common statistical methods in evaluated journals (Doc)

#### 253 **Author contribution**

254 Conceived and designed the experiments: DSY ZXB LBB. Performed the experiments: DSY XH ZJG.  
255 Analyzed the data: DSY LBB. Contributed reagents/materials/analysis tools: DSY ZXB LBB.  
256 Contributed to the writing of the manuscript: DSY LBB ZXB.

#### 257 **References**

- 258 1. Fosang AJ, Colbran RJ. Transparency Is the Key to Quality. *The Journal of biological chemistry*.  
259 2015;290(50):29692-4.
- 260 2. Nature. Reducing our irreproducibility. *Nature*. 2013;496:398( DOI:  
261 <https://doi.org/10.1038/496398a>).

- 262 3. Wu R, Glen P, Ramsay T, Martel G. Reporting quality of statistical methods in surgical  
263 observational studies: protocol for systematic review. *Systematic reviews*. 2014;3:70.
- 264 4. Schor S, Karten I. Statistical evaluation of medical journal manuscripts. *Jama*.  
265 1966;195(13):1123-8.
- 266 5. Yoon U, Knobloch K. Quality of reporting in sports injury prevention abstracts according to the  
267 CONSORT and STROBE criteria: an analysis of the World Congress of Sports Injury Prevention in 2005  
268 and 2008. *Br J Sports Med*. 2012;46(3):202-6.
- 269 6. Lang TA, Altman DG. Basic statistical reporting for articles published in biomedical journals: the  
270 "Statistical Analyses and Methods in the Published Literature" or the SAMPL Guidelines. *International*  
271 *journal of nursing studies*. 2015;52(1):5-9.
- 272 7. Pentti Nieminen JIV. An instrument to assess the statistical intensity of medical research papers.  
273 *PloS one*. 2017.
- 274 8. Nieminen P, Toljamo T, Vahanikkila H. Reporting data analysis methods in high-impact  
275 respiratory journals. *ERJ open research*. 2018;4(2).
- 276 9. Emerson JD, Colditz GA. Use of statistical analysis in the New England Journal of Medicine. *The*  
277 *New England journal of medicine*. 1983;309(12):709-13.
- 278 10. Scales CD, Norris RD, Peterson BL, Preminger GM, Dahm P. Clinical Research and Statistical  
279 Methods in the Urology Literature. *Journal of Urology*. 2005;174(4 Part 1):1374-9.
- 280 11. Guglielminotti J, Dechartres A, Mentre F, Montravers P, Longrois D, Laouenan C. Reporting and  
281 Methodology of Multivariable Analyses in Prognostic Observational Studies Published in 4  
282 Anesthesiology Journals: A Methodological Descriptive Review. *Anesthesia and analgesia*.  
283 2015;121(4):1011-29.
- 284 12. Weissgerber TL, Garcia-Valencia O. Why we need to report more than 'Data were Analyzed by  
285 t-tests or ANOVA'. 2018;7.
- 286 13. Zhang YY, Zhou XB, Wang QZ, Zhu XY. Quality of reporting of multivariable logistic regression  
287 models in Chinese clinical medical journals. *Medicine*. 2017;96(21):e6972.
- 288 14. Zhu X, Zhou X, Zhang Y, Sun X, Liu H, Zhang Y. Reporting and methodological quality of survival  
289 analysis in articles published in Chinese oncology journals. *Medicine*. 2017;96(50):e9204.
- 290 15. Gosho M, Sato Y, Nagashima K, Takahashi S. Trends in study design and the statistical methods  
291 employed in a leading general medicine journal. *Journal of clinical pharmacy and therapeutics*.  
292 2018;43(1):36-44.
- 293 16. ., Gosho M, Nagashima K, Takahashi S, Ware JH, Laird NM. Statistical Methods in the Journal - An  
294 Update. *The New England journal of medicine*. 2017;376(11):1086-7.
- 295 17. Horton NJ, Switzer SS. Statistical methods in the journal. *The New England journal of medicine*.  
296 2005;353(18):1977-9.
- 297 18. von Elm E, Altman DG, Egger M, Pocock SJ, Gotsche PC, Vandenbroucke JP. Strengthening the  
298 Reporting of Observational Studies in Epidemiology (STROBE) statement: guidelines for reporting  
299 observational studies. *BMJ (Clinical research ed)*. 2007;335(7624):806-8.
- 300 19. Vandenbroucke JP. The making of STROBE. *Epidemiology*. 2007;18(6):797-9.
- 301 20. Zhang Z. Missing data exploration: highlighting graphical presentation of missing pattern. *Annals*  
302 *of translational medicine*. 2015;3(22):356.
- 303 21. Tseng CH, Chen YH. Regularized approach for data missing not at random. *Statistical methods in*  
304 *medical research*. 2019;28(1):134-50.

305 22. Real J, Forne C, Roso-Llorach A, Martinez-Sanchez JM. Quality Reporting of Multivariable  
306 Regression Models in Observational Studies: Review of a Representative Sample of Articles Published  
307 in Biomedical Journals. *Medicine*. 2016;95(20):e3653.

308 23. Casals M, Girabent-Farres M, Carrasco JL. Methodological quality and reporting of generalized  
309 linear mixed models in clinical medicine (2000-2012): a systematic review. *PloS one*.  
310 2014;9(11):e112653.

311 24. Kumar R, Indrayan A, Chhabra P. Reporting quality of multivariable logistic regression in selected  
312 Indian medical journals. *Journal of postgraduate medicine*. 2012;58(2):123-6.

313

314 Table.1 The general characteristics of included studies

315 Table 2 Common statistical methods in medical studies

316 Table.3 Reporting of common statistical methods in evaluated journals

317 Table.4 Univariate and multivariate logistic regression analyses of predictive factors associated with  
318 superior statistical methods reporting quality

319 Figure 1 Search strategy for PubMed

320 Figure 2 Flow diagram of the screening articles

321 Figure.3 Trends of the statistical methods

322

323

324

325

326

327

328

329

330

331

332

333

334

335

336

337

338

339

340

341

342

343

344

345

346

347

348



Table.1 The general characteristics of included studies

| Characteristic                                         | N (%)       | Mean (SD) of reporting quality score | <i>t</i> / <i>F</i> | <i>P</i> | Median number of statistical methods* | <i>Z</i> / $\chi^2$ | <i>P</i> |
|--------------------------------------------------------|-------------|--------------------------------------|---------------------|----------|---------------------------------------|---------------------|----------|
| <b>Journal</b>                                         |             |                                      |                     |          |                                       |                     |          |
| European Urology                                       | 31 (16.06)  | 0.43 (0.14)                          |                     |          | 2.00 (2.00)                           |                     |          |
| Journal Of Urology                                     | 54 (27.98)  | 0.38 (0.13)                          |                     |          | 2.00 (2.00)                           |                     |          |
| BJU International                                      | 47 (24.35)  | 0.42 (0.14)                          | 4.271               | 0.002    | 2.00 (2.75)                           | 4.830               | 0.305    |
| Prostate Cancer And Prostatic Diseases                 | 26 (13.47)  | 0.41 (0.15)                          |                     |          | 2.50 (2.25)                           |                     |          |
| Prostate                                               | 35 (18.13)  | 0.51 (0.18)                          |                     |          | 3.00 (2.00)                           |                     |          |
| <b>Type of study</b>                                   |             |                                      |                     |          |                                       |                     |          |
| Cohort studies                                         | 79 (40.93)  | 0.42 (0.15)                          |                     |          | 2.00 (2.00)                           |                     |          |
| Case-control studies                                   | 58 (30.05)  | 0.43 (0.16)                          | 0.048               | 0.953    | 2.00 (2.75)                           | 0.439               | 0.803    |
| Cross-sectional studies                                | 56 (29.02)* | 0.42 (0.14)                          |                     |          | 2.00 (2.25)                           |                     |          |
| <b>Funding support</b>                                 |             |                                      |                     |          |                                       |                     |          |
| No                                                     | 81 (41.97)  | 0.42 (0.16)                          | 0.092               | 0.762    | 2.00 (1.50)                           | -0.084              | 0.933    |
| Yes                                                    | 112 (58.03) | 0.42 (0.15)                          |                     |          | 2.00 (2.00)                           |                     |          |
| <b>Number of authors</b>                               |             |                                      |                     |          |                                       |                     |          |
| <7                                                     | 95 (49.22)  | 0.39 (0.14)                          | 0.246               | 0.620    | 2.00 (2.00)                           | -2.286              | 0.022    |
| ≥7                                                     | 98 (50.78)  | 0.46 (0.15)                          |                     |          | 2.00 (3.00)                           |                     |          |
| <b>Publication time</b>                                |             |                                      |                     |          |                                       |                     |          |
| <2014                                                  | 110 (56.99) | 0.42 (0.16)                          | 0.818               | 0.367    | 2.00 (2.00)                           | -1.721              | 0.085    |
| ≥2014                                                  | 83 (43.01)  | 0.43 (0.14)                          |                     |          | 2.00 (3.00)                           |                     |          |
| <b>International collaborative authorship</b>          |             |                                      |                     |          |                                       |                     |          |
| No                                                     | 164 (84.97) | 0.42 (2.23)                          | 0.161               | 0.689    | 2.00 (2.00)                           | -0.078              | 0.938    |
| Yes                                                    | 29 (15.03)  | 0.43 (2.39)                          |                     |          | 2.00 (3.00)                           |                     |          |
| <b>Participation of statistician or epidemiologist</b> |             |                                      |                     |          |                                       |                     |          |
| No                                                     | 121 (62.69) | 0.41 (0.15)                          | 1.269               | 0.261    | 2.00 (2.00)                           | -0.109              | 0.913    |
| Yes                                                    | 72 (37.31)  | 0.44 (0.16)                          |                     |          | 2.00 (3.00)                           |                     |          |
| <b>Affiliation of corresponding author</b>             |             |                                      |                     |          |                                       |                     |          |
| Hospital                                               | 56 (29.02)  | 0.42 (0.15)                          |                     |          | 2.00 (2.75)                           |                     |          |
| University                                             | 112 (58.03) | 0.42 (0.15)                          | 0.027               | 0.973    | 2.00 (2.00)                           | 4.325               | 0.115    |
| Institute                                              | 25(12.95)   | 0.42 (0.18)                          |                     |          | 1.00 (2.00)                           |                     |          |
| <b>Origin region of corresponding author</b>           |             |                                      |                     |          |                                       |                     |          |
| Asia                                                   | 29 (15.03)  | 0.41 (0.13)                          |                     |          | 2.50 (2.00)                           |                     |          |
| Europe                                                 | 59 (30.57)  | 0.43 (0.16)                          |                     |          | 2.00 (2.00)                           |                     |          |
| America/Canada                                         | 99 (51.30)  | 0.41 (0.15)                          | 0.255               | 0.907    | 2.00 (2.00)                           | 5.214               | 0.266    |
| Australia                                              | 5 (2.59)    | 0.47 (0.54)                          |                     |          | 3.00 (3.00)                           |                     |          |

Africa

1 (0.52)

0.42

2.00

350

351

Table 2 Common statistical methods in medical studies

|                             |                                                  |             |
|-----------------------------|--------------------------------------------------|-------------|
| Descriptive statistics      |                                                  | 190 (98.4%) |
|                             | Means (standard deviation)                       | 165 (85.5%) |
|                             | Median (interpercentile range)                   | 39 (20.2%)  |
|                             | Proportion                                       | 122 (63.2%) |
|                             | Rate (e.g. incidence rate, survival rate)        | 7 (3.6%)    |
|                             | Ratio (e.g. odds ratios, relative risk)          | 11 (5.7%)   |
| Ancillary analyses          |                                                  | 47 (24.4%)  |
|                             | Variable transforms                              | 19 (9.8%)   |
|                             | Variable constructs                              | 7 (3.6%)    |
|                             | Standardizing                                    | 6 (3.1 %)   |
|                             | Matching                                         | 0 (0)       |
|                             | Propensity score methods                         | 1 (0.5%)    |
|                             | Sensitivity analysis                             | 16 (8.3%)   |
|                             | Stratification or sub-group analyses             | 14 (7.3%)   |
| Student <i>t</i> -test      |                                                  | 40 (20.7%)  |
|                             | One sample <i>t</i> -test                        | 1 (0.5%)    |
|                             | Paired/matched <i>t</i> -test                    | 0 (0)       |
|                             | Two independent samples <i>t</i> -test           | 38 (19.7%)  |
|                             | Z test                                           | 1 (0.5%)    |
| Analysis of variance(ANOVA) |                                                  | 25 (13.0%)  |
|                             | Completely random design ANOVA                   | 24 (12.4%)  |
|                             | Randomized block design ANOVA                    | 1 (0.5%)    |
|                             | Factorial design ANOVA                           | 0 (0)       |
|                             | Cross-over ANOVA                                 | 0 (0)       |
|                             | Analysis of covariance                           | 0 (0)       |
|                             | Multivariate Analysis Of Variance                | 0 (0)       |
| Multiple comparisons        |                                                  | 5 (2.6%)    |
|                             | Students-Newman-Keuls method                     | 0 (0)       |
|                             | Bonferroni method                                | 3 (1.6%)    |
|                             | Dunnett method                                   | 1 (0.5%)    |
|                             | Duncan's method                                  | 0 (0)       |
|                             | LSD method                                       | 0 (0)       |
|                             | Tukey method                                     | 0 (0)       |
|                             | Sidak method                                     | 0(0)        |
|                             | Scheffe method                                   | 1 (0.5%)    |
|                             | FDR (false discovery rate)                       | 0 (0)       |
| Repeated measurement data   |                                                  | 12 (6.2%)   |
|                             | Repeated measurement data ANOVA                  | 4 (2.1%)    |
|                             | GEE (Generalized estimating equation)            | 2 (1.0%)    |
|                             | MMRM (Mixed-effect models for repeated measures) | 1 (0.5%)    |

|                              |                                        |             |
|------------------------------|----------------------------------------|-------------|
|                              | GLMM (generalized linear mixed models) | 5 (2.6%)    |
| Non-parametric test          |                                        | 44 (22.8%)  |
|                              | Sign test                              | 0 (0)       |
|                              | Wilcoxon signed-rank test              | 21 (10.9%)  |
|                              | Mann-Whitney test                      | 18 (9.3%)   |
|                              | Kruskal-Wallis <i>H</i> test           | 7 (3.6%)    |
|                              | Friedman test                          | 0 (0)       |
|                              | Kolmogorov-Smirnov test                | 2(1.0%)     |
|                              | Median test                            | 0 (0)       |
| Contingency tables           |                                        | 100 (51.8%) |
|                              | Chi-square test                        | 90 (46.6%)  |
|                              | McNemar's test                         | 0 (0)       |
|                              | Fisher's exact test                    | 31 (16.1%)  |
| Correlation analysis         |                                        | 26 (13.5%)  |
|                              | Pearson correlation coefficient        | 5 (2.6%)    |
|                              | Spearman correlation coefficient       | 11 (5.7%)   |
|                              | Kendall's correlation coefficient      | 1 (0.5%)    |
|                              | Trend test                             | 12 (6.2%)   |
|                              | Partial correlation coefficient        | 0 (0)       |
|                              | Multiple correlation coefficient       | 0 (0)       |
| Multiple regression          |                                        | 106 (54.9%) |
|                              | Linear regression                      | 7 (3.6%)    |
|                              | Curve estimate                         | 1 (0.5%)    |
|                              | Path analysis                          | 0 (0)       |
|                              | Logistic regression                    | 93 (48.2%)  |
|                              | Poisson regression                     | 3 (1.6%)    |
|                              | Negative binominal                     | 2 (1.0%)    |
|                              | Spline regression                      | 0 (0)       |
|                              | Other regression model                 | 5 (2.6%)    |
| Survival analysis            |                                        | 165 (85.5%) |
|                              | Kaplan-Meier estimate                  | 24(12.4%)   |
|                              | Life-table method estimate             | 1 (0.5%)    |
|                              | Log-rank test                          | 10 (5.2%)   |
|                              | Breslow test                           | 0 (0)       |
|                              | Tarone-Ware test                       | 0 (0)       |
|                              | Cox proportional hazards model         | 41 (21.2%)  |
|                              | Other survival model                   | 4 (2.1%)    |
| Consistency measurement      |                                        | 2 (1.0%)    |
| Principal component analysis |                                        | 0 (0)       |
| Factor analysis              |                                        | 0 (0)       |
| Discriminant analysis        |                                        | 0 (0)       |
| Cluster analysis             |                                        | 2(1.0%)     |
| Log-linear models            |                                        | 0 (0)       |

|                                    |  |           |
|------------------------------------|--|-----------|
| Structural equation modeling (SEM) |  | 0 (0)     |
| Multilevel modeling                |  | 0 (0)     |
| Multi dimensional scaling analysis |  | 0 (0)     |
| Bayesian analyses                  |  | 0 (0)     |
| Other statistical methods          |  | 14 (7.3%) |

352

353

Table.3 Reporting of common statistical methods in evaluated journals

| Preliminary analysis                                                                                                                                         |                                                                                                                                                  | Reporting rate                |
|--------------------------------------------------------------------------------------------------------------------------------------------------------------|--------------------------------------------------------------------------------------------------------------------------------------------------|-------------------------------|
| *                                                                                                                                                            | 1. Sample calculation / Power analysis                                                                                                           | 6.7% (13/193)                 |
| *                                                                                                                                                            | 2. Whether there were outliers in an article                                                                                                     | 1.0% (2/193)                  |
|                                                                                                                                                              | 3. Report how any missing data were treated                                                                                                      | 9.8% (19/193)                 |
| If mean with standard deviation, median with interpercentile range and proportion were reported in an article, item 4, 5, 6 are considered applicable items. | 4. Mean and standard deviation with examine for normality                                                                                        | 7.8% (154/193)                |
|                                                                                                                                                              | 5. Median and interpercentile range with explaining reason (non-normality, ordinal data, quantitative variable without exact data at either end) | 22.8% (44/193)                |
|                                                                                                                                                              | 6. Proportion (report numerator and denominator)                                                                                                 | 10.9% (21/193)                |
| *                                                                                                                                                            | 7. Name of statistical package or program reported                                                                                               | 84.5% (158/187 <sup>a</sup> ) |
| *                                                                                                                                                            | 8. Report the alpha level (e.g. 0.05) that defines statistical significance                                                                      | 65.2% (122/187 <sup>a</sup> ) |
| *                                                                                                                                                            | 9. Report one or two tailed for test. (Justify the use of one-tailed tests.)                                                                     | 44.9% (84/187 <sup>a</sup> )  |
| *                                                                                                                                                            | 10. Exact P-values for test (e.g. P=0.23)                                                                                                        | 86.1% (161/187 <sup>a</sup> ) |
| *                                                                                                                                                            | 11. Confidence intervals                                                                                                                         | 69.4% (134/193)               |
| <b>Statistical methods</b>                                                                                                                                   |                                                                                                                                                  |                               |
| Student <i>t</i> -test                                                                                                                                       |                                                                                                                                                  | n=41                          |
|                                                                                                                                                              | 1. Assessing assumptions for <i>t</i> -test                                                                                                      | 17.1% (7/41)                  |
|                                                                                                                                                              | 2. Report the type of <i>t</i> -test (e.g. one sample, two independent samples, paired/matched)                                                  | 70.7% (29/41)                 |
| ANOVA/ANCOVA                                                                                                                                                 |                                                                                                                                                  | n=25                          |
|                                                                                                                                                              | 1. Assessing assumptions for ANOVA /ANCOVA                                                                                                       | 4.0% (1/25)                   |
|                                                                                                                                                              | 2. Report the type of ANOVA (e.g. one way, randomized block design, factorial design, repeated measure design, cross-over design etc. )          | 48.0% (12/25)                 |
| Chi-square test                                                                                                                                              |                                                                                                                                                  | n=96                          |
|                                                                                                                                                              | 1. Report the type of Chi-square test (Pearson Chi-square test, continuity correction Chi-square test, McNemar's test or Fisher's exact test)    | 74.0% (71/96)                 |
| Non-parametric test                                                                                                                                          |                                                                                                                                                  | n=39                          |
|                                                                                                                                                              | 1. Provide reasons (continuous variable with non-normality, ordinal data, quantitative variable without exact data at either end)                | 23.1% (9/39)                  |
|                                                                                                                                                              | 2. Report the type of non-parametric test (e.g. sign test, Wilcoxon signed-rank test, Mann-Whitney test, Kruskal-Wallis H test, Friedman's test) | 100% (39/39)                  |
| Linear correlation                                                                                                                                           |                                                                                                                                                  | n=13                          |

|                                     |                                                                                                                                                                                                                           |               |
|-------------------------------------|---------------------------------------------------------------------------------------------------------------------------------------------------------------------------------------------------------------------------|---------------|
|                                     | 1.Report the type of correlation coefficient, with confidence intervals (e.g.pearson, spearman, Kendall's tau_b correlation or trend test) and provide reasons (continuous variable with non-normality, ordinal variable) | 100% (13/13)  |
| Multiple linear regression          |                                                                                                                                                                                                                           | n=9           |
|                                     | 1. Conformity with a linear gradient                                                                                                                                                                                      | 55.6% (5/9)   |
|                                     | 2. Reason of selection of variables (e.g. based on published literatures, professional knowledge, results of univariate analysis or decision of the researcher)                                                           | 22.2% (2/9)   |
|                                     | 3.Methods for variable selection (all possible subsets selection, forward selection, backward selection, stepwise selection)                                                                                              | 55.6% (5/9)   |
|                                     | 4. Interactions among independent variables                                                                                                                                                                               | 22.2% (2/9)   |
|                                     | 5. Colinearity of independent variables                                                                                                                                                                                   | 11.1% (1/9)   |
|                                     | 6. Coding of variables                                                                                                                                                                                                    | 11.1% (1/9)   |
|                                     | 7. Validation of the statistical model                                                                                                                                                                                    | 11.1% (1/9)   |
|                                     | 8. Goodness of fit test (e.g. coefficient of determination, $r^2$ )                                                                                                                                                       | 11.1% (1/9)   |
| Multiple Logistic regression        |                                                                                                                                                                                                                           | n=93          |
|                                     | 1.Sufficient events (>10) per variable (the ratio of outcome events to independent variables)                                                                                                                             | 98.9% (92/93) |
|                                     | 2.Conformity with linear gradient for continuous or rank variables                                                                                                                                                        | 26.9% (25/93) |
|                                     | 3. Reason of selection of variables (e.g. based on published literatures, professional knowledge, results of univariate analysis or decision of the researcher)                                                           | 8.6% (8/93)   |
|                                     | 4.Methods for variable selection (forward selection, backward selection, stepwise selection)                                                                                                                              | 24.7% (23/93) |
|                                     | 5. Interactions between independent variables                                                                                                                                                                             | 25.8% (24/93) |
|                                     | 6.Colinearity of independent variables                                                                                                                                                                                    | 3.2% (3/93)   |
|                                     | 7.Coding of variables                                                                                                                                                                                                     | 20.4% (19/93) |
|                                     | 8.Validation of the statistical model (e.g. likelihood ratio test, Wald test, score test)                                                                                                                                 | 6.5% (6/93)   |
|                                     | 9.Goodness of fit test                                                                                                                                                                                                    | 5.4% (5/93)   |
| Survival analysis                   |                                                                                                                                                                                                                           | n=49          |
|                                     | 1. Identify dates or events marking the beginning and the end of the time period analyzed                                                                                                                                 | 28.6% (14/49) |
|                                     | 2. Report follow-up information (e.g. the mean of follow-up time, the median of follow-up time, the average of follow-up, the range of follow-up, person-years)                                                           | 32.7% (16/49) |
|                                     | 3. Survival rate or survival function                                                                                                                                                                                     | 49.0% (24/49) |
|                                     | 4. Report the circumstances under which data were censored                                                                                                                                                                | 12.2% (6/49)  |
| If comparative analysis was applied |                                                                                                                                                                                                                           | n=25          |
|                                     | 1. Report the statistical methods applied to compare two or more survival curves.                                                                                                                                         | 72.0% (18/25) |

|                          |                                                                                                                                                                              |               |
|--------------------------|------------------------------------------------------------------------------------------------------------------------------------------------------------------------------|---------------|
|                          | 2. Report median survival time                                                                                                                                               | 80.0% (20/25) |
| If Cox model was applied |                                                                                                                                                                              | n=42          |
|                          | 1. Reported assumption of proportional hazard (assumption of PH) for Cox proportional hazards regression model (Cox model)                                                   | 66.7% (28/42) |
|                          | 2. Conformity with a linear gradient for continuous or rank variables for Cox model                                                                                          | 31.0% (13/42) |
|                          | 3. Interactions between independent variables for Cox model                                                                                                                  | 40.5% (17/42) |
|                          | 4. Colinearity of independent variables for the Cox model                                                                                                                    | 2.4% (1/42)   |
|                          | 5. Reason of selection of variables (e.g. based on published literature, professional knowledge, results of univariate analysis or decision of the researcher) for Cox model | 11.9% (5/42)  |
|                          | 6. Methods for variable selection (forward selection, backward selection, stepwise selection) for Cox model                                                                  | 16.7% (7/42)  |
|                          | 7. Coding of variables for Cox model                                                                                                                                         | 16.7% (7/42)  |

354 a: There were six articles that did not use any statistical methods, so the total should be 187

355

356 Table.4 Univariate and multivariate logistic regression analyses of predictive factors associated with superior

357 statistical methods reporting quality

| Characteristic                                  | OR (95%CI)       | P     | OR (95%CI)       | P     |
|-------------------------------------------------|------------------|-------|------------------|-------|
| Type of study                                   |                  |       |                  |       |
| Cross-sectional studies                         | 1.00             |       |                  |       |
| Case-control studies                            | 1.26 (0.54-2.98) | 0.588 |                  |       |
| Cohort studies                                  | 1.25 (0.57-2.77) | 0.577 |                  |       |
| Funding support                                 |                  |       |                  |       |
| No                                              | 1.00             |       |                  |       |
| Yes                                             | 1.29 (0.67-2.47) | 0.448 |                  |       |
| Number of authors                               |                  |       |                  |       |
| <7                                              | 1.00             |       |                  |       |
| ≥7                                              | 2.23 (1.13-4.37) | 0.020 | 2.06 (1.04-4.08) | 0.038 |
| International collaborative authorship          |                  |       |                  |       |
| No                                              | 1.00             |       |                  |       |
| Yes                                             | 0.47 (0.77-2.88) | 0.768 |                  |       |
| Participation of statistician or epidemiologist |                  |       |                  |       |
| No                                              | 1.00             |       |                  |       |
| Yes                                             | 1.92 (1.04-3.71) | 0.048 | 1.73 (1.18-3.39) | 0.019 |
| Publication time                                |                  |       |                  |       |
| <2014                                           | 1.00             |       |                  |       |
| ≥2014                                           | 1.38 (0.72-2.65) | 0.329 |                  |       |
| Affiliation of corresponding author             |                  |       |                  |       |
| Institute                                       | 1.00             |       |                  |       |
| University                                      | 0.74 (0.20-1.90) | 0.535 |                  |       |
| Hospital                                        | 0.58 (0.29-1.67) | 0.311 |                  |       |
| Origin region of corresponding author           |                  |       |                  |       |
| Asia                                            | 1.00             |       |                  |       |



|                |                  |       |
|----------------|------------------|-------|
| Europe         | 1.74 (0.61-5.00) | 0.303 |
| America/Canada | 1.10 (0.40-3.02) | 0.861 |
| Australia      | 0.92 (0.09-9.81) | 0.943 |
| Africa         | 1.00             | 1.000 |

---

358

359

360

#1 “cross-sectional studies”

#2 “cross-sectional study”

#3 “prevalence studies”

#4 “prevalence study”

#5 “case control studies”

#6 “case control study”

#7 “cohort studies”

#8 “cohort study”

#9 “prospective studies”

#10 “prospective study”

#11 “incidence studies”

#12 “incidence study”

#13 1 OR 2 OR 3 OR 4 OR 5 OR 6 OR 7 OR 8 OR 9 OR  
10 OR 11 OR 12

#14 European Urology [Journal]

#15 J Urol [Journal]

#16 BJU International [Journal]

#17 Prostate Cancer And Prostatic Diseases [Journal]

#18 Prostate [Journal]

#19 #14 or #15 or #16 or #17 or #18

#20 2009/01/01-2019/09/30

#21 #13 and #19 and #11

bioRxiv preprint doi: <https://doi.org/10.1101/2020.03.19.998765>; this version posted March 19, 2020. The copyright holder for this preprint (which was not certified by peer review) is the author/funder, who has granted bioRxiv a license to display the preprint in perpetuity. It is made available under aCC-BY 4.0 International license.

Figure.1 PubMed search strategy

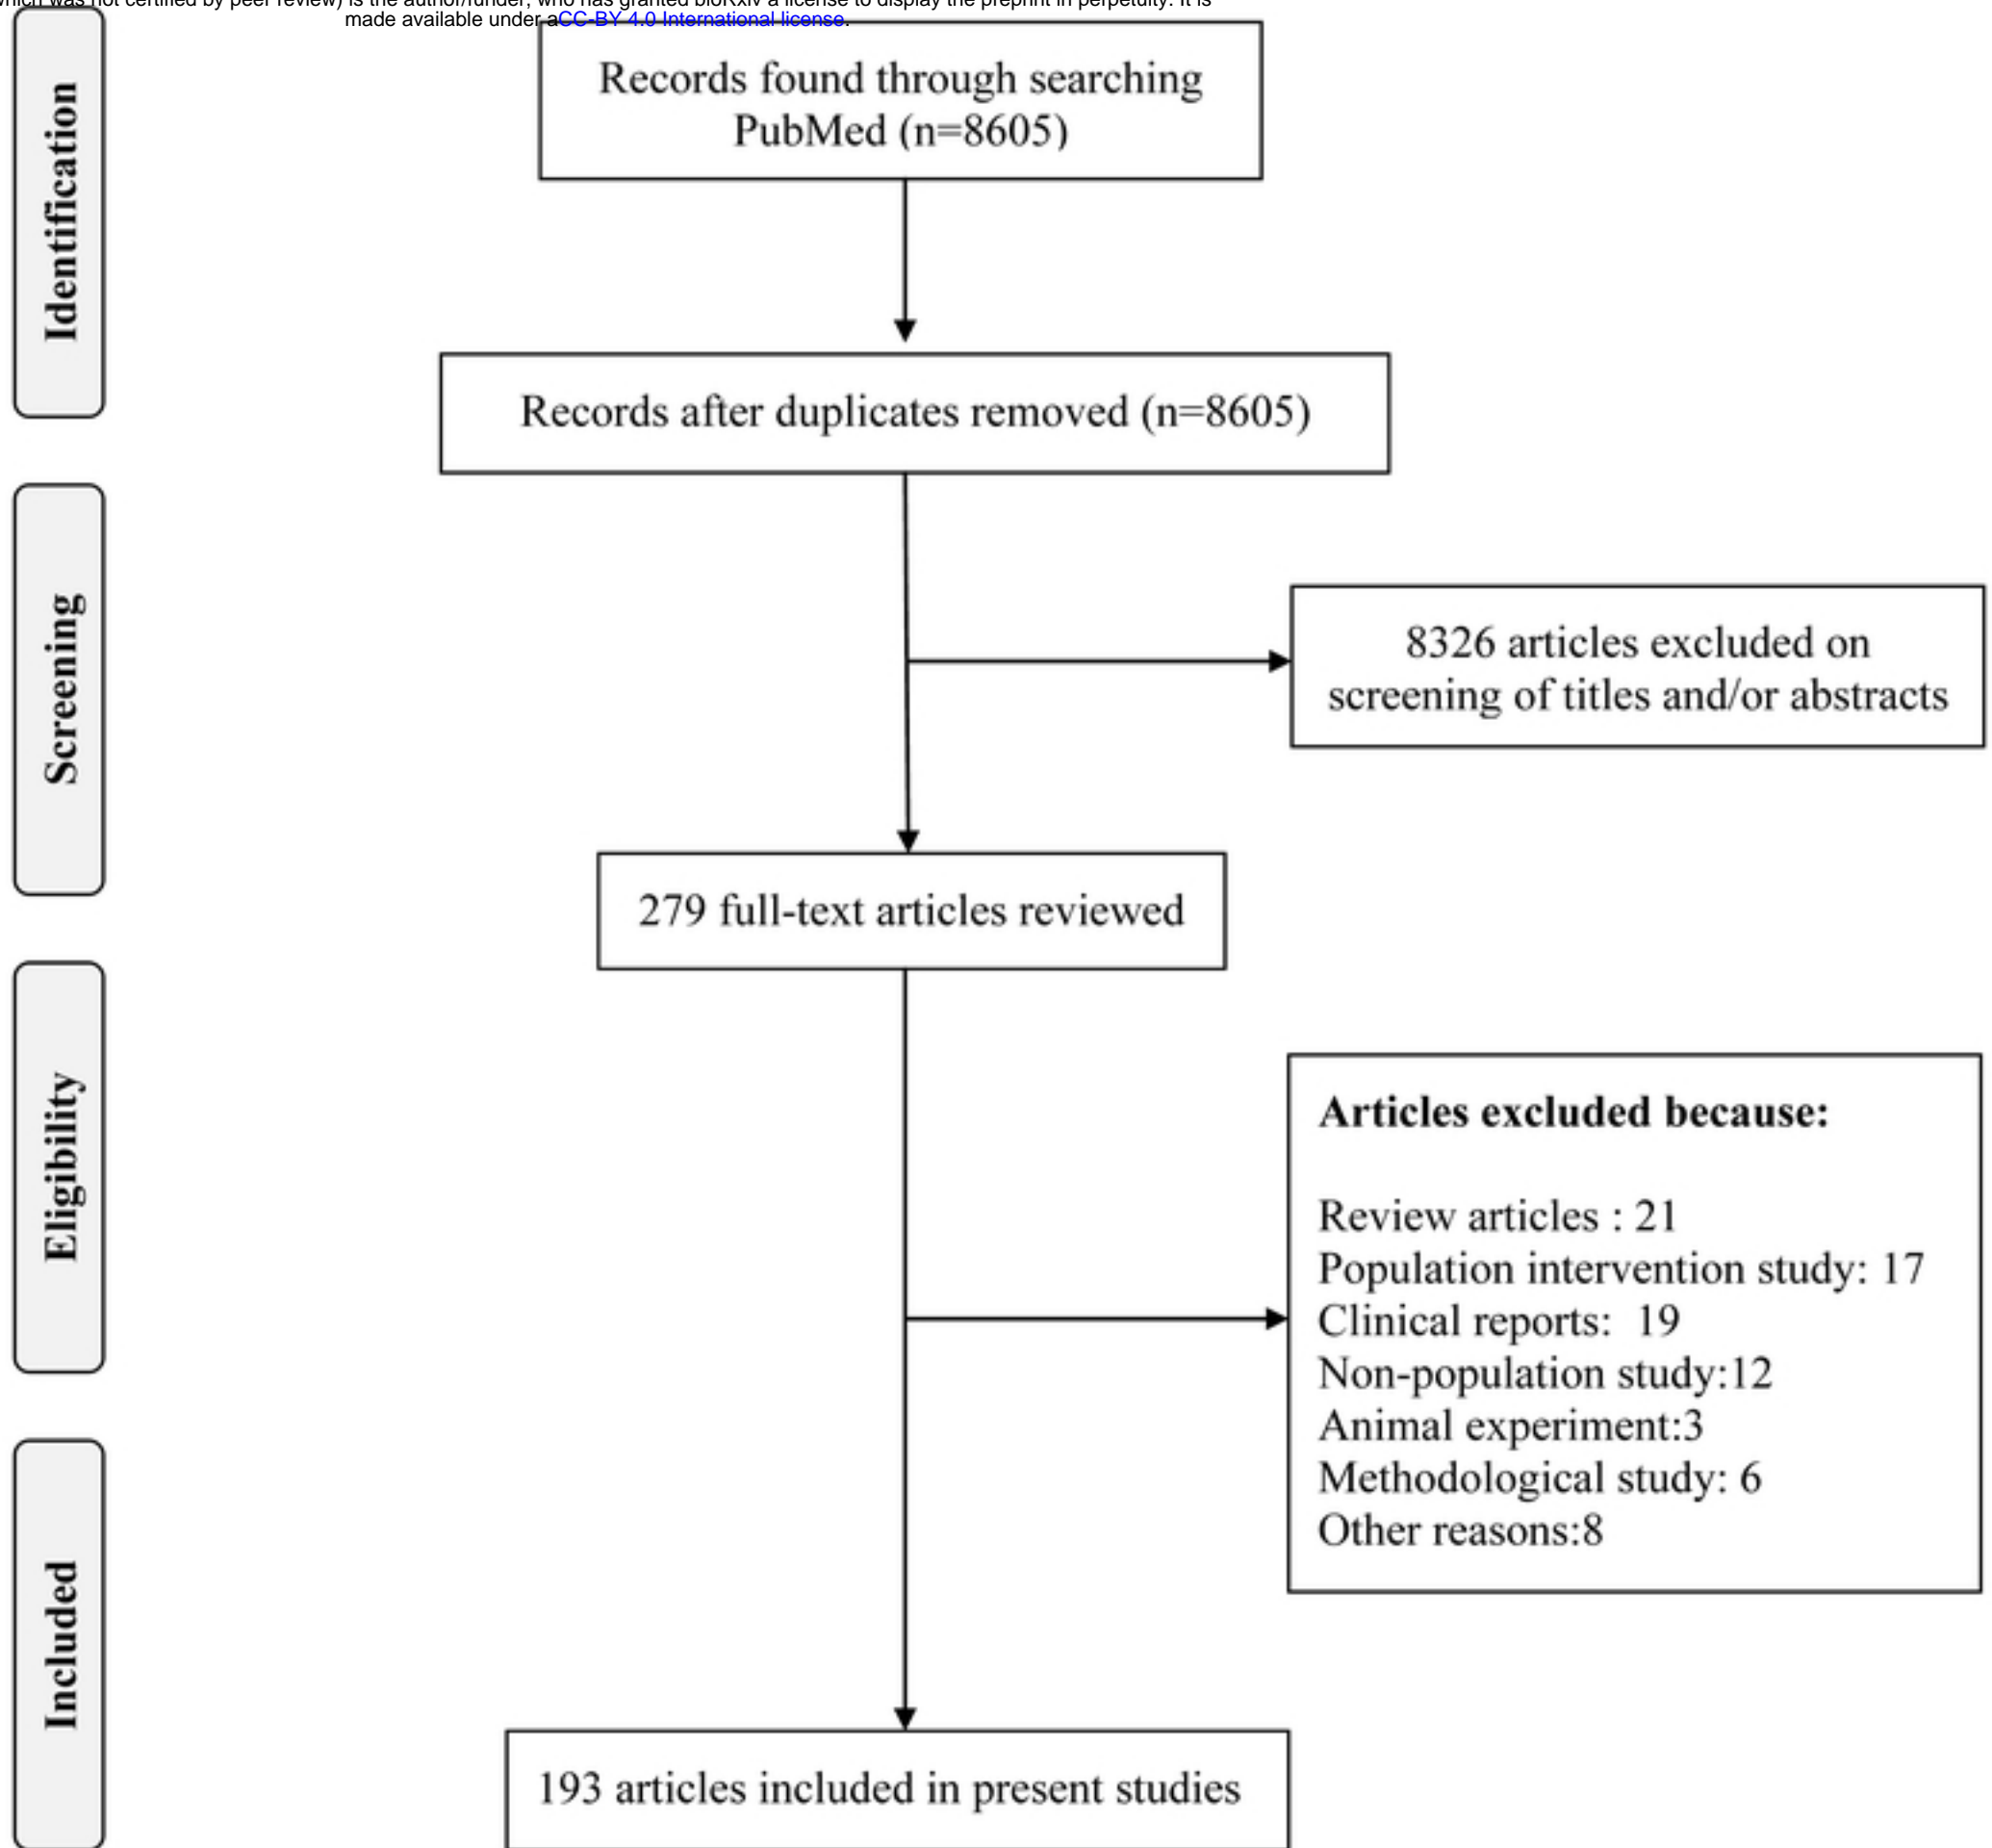

Figure

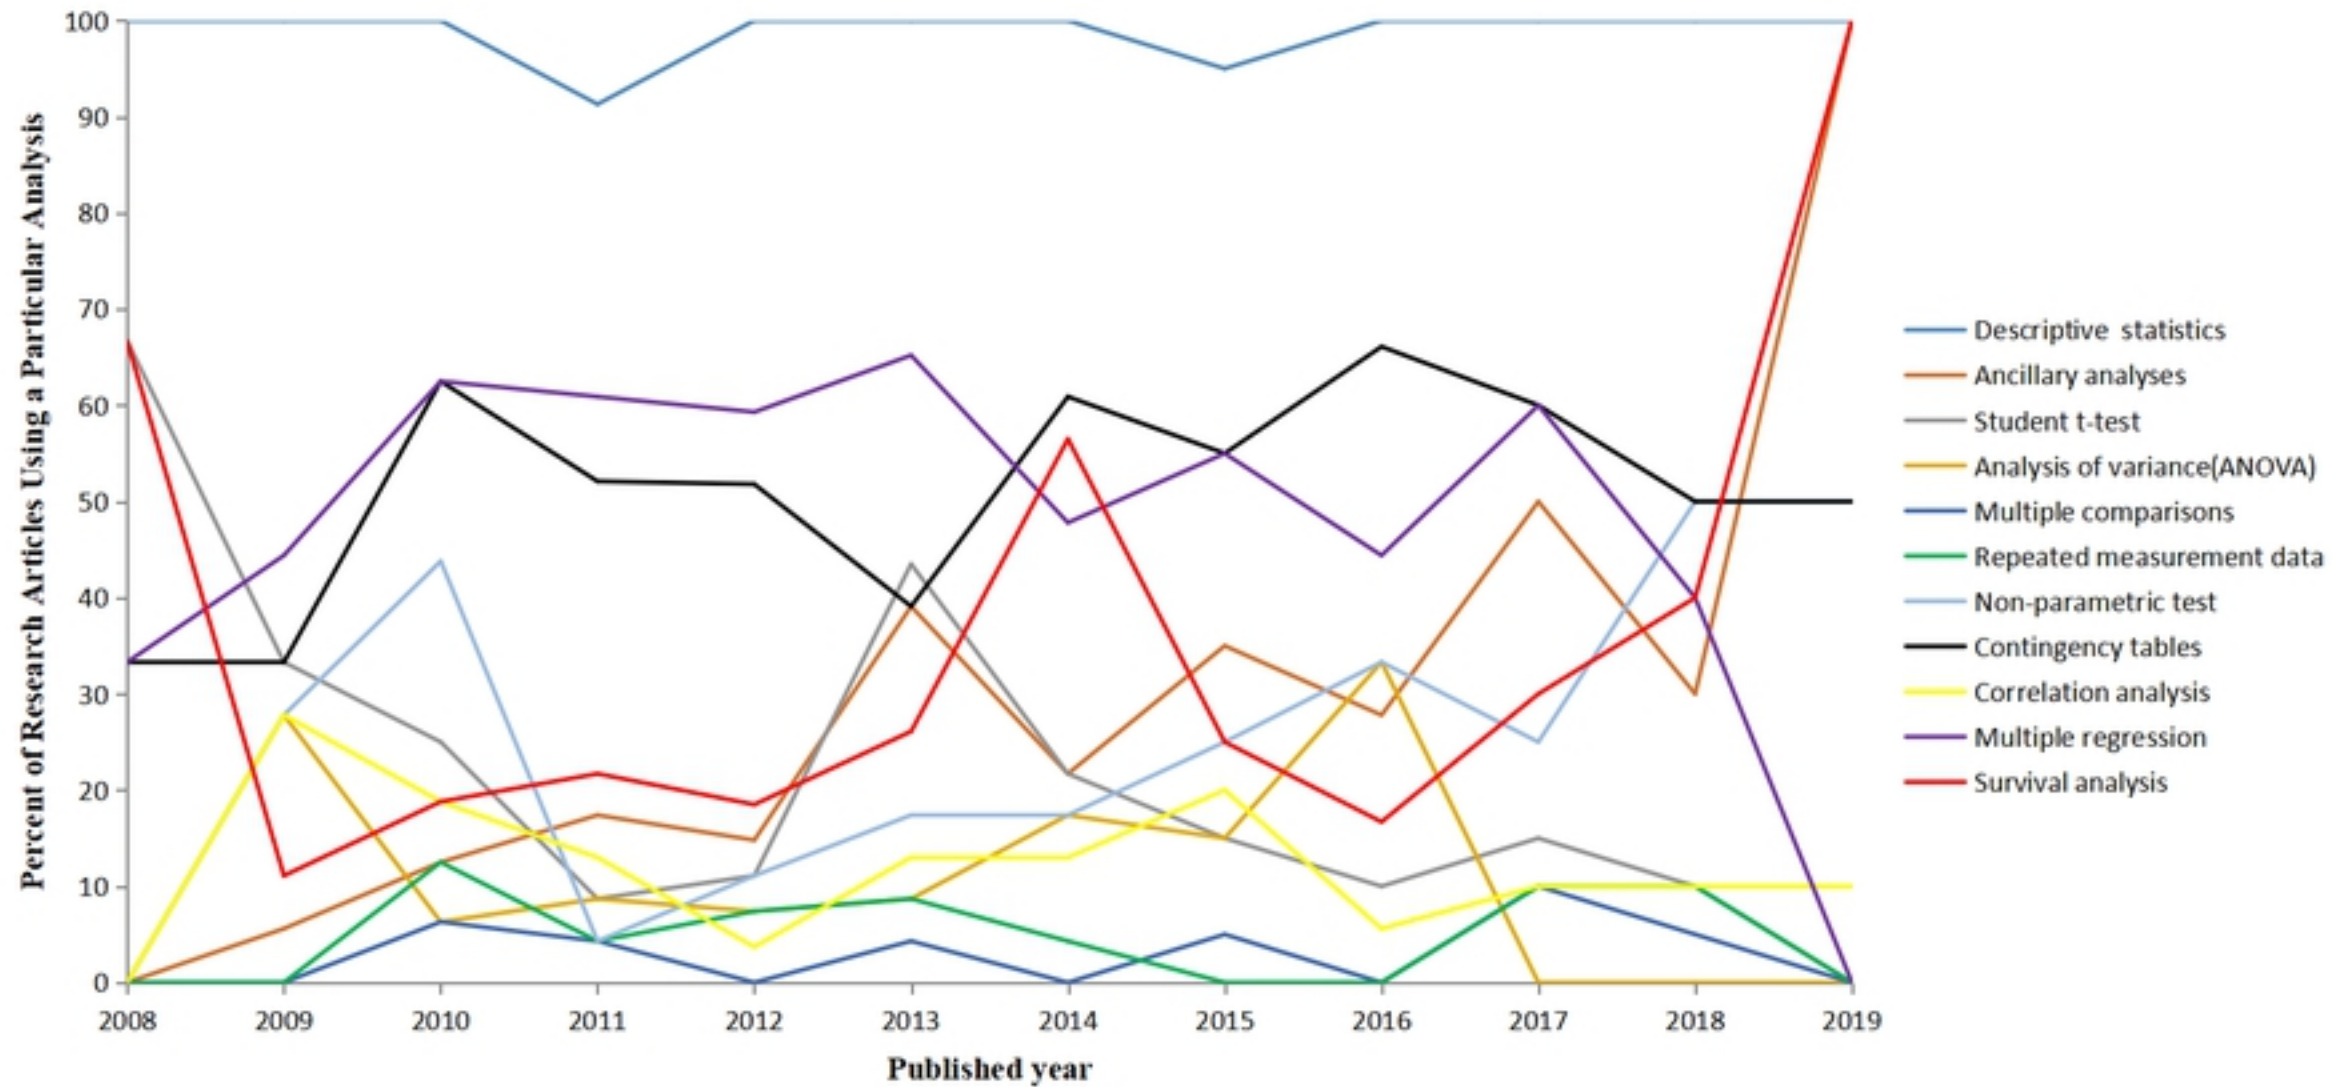

Figure
